# Supplementary material for: From the Environment to the Host: Re-Wiring of the Transcriptome of Pseudomonas aeruginosa from 22°C to 37°C
Source: PLoS One. 2014 Feb 24;9(2):e89941. doi: 10.1371/journal.pone.0089941 (PMC3933690; doi:10.1371/journal.pone.0089941)
Supplement: Table S2 — List of temperature regulated genes on P. aeruginosa PAO1 transcriptomes. Table with the complete list of genes up- and down-regulated in the microarrays. Fold changes greater than 1 are indicative or genes up-regulated at 22°C, while fold changes less than 1 are indicative of genes up-regulated at 37°C. (XLSX) [file pone.0089941.s007.xlsx]

## Sheet: TS2 - All up-down genes
Table S 2. List of temperature regulated genes on P. aeruginosa PAO1 transcriptomes
Locus	Fold change	Name	Product name
PA0050	5.1012		Hypothetical protein
PA0051	4.8185	phzH	Potential phenazine-modifying enzyme
PA0052	5.4047		Hypothetical protein
PA0059	4.6221	osmC	Osmotically inducible protein OsmC
PA0129	0.2665	bauD	Gamma-aminobutyrate permease
PA0130	0.0865	bauC	Probable aldehyde dehydrogenase
PA0131	0.2506	bauB	Hypothetical protein
PA0132	0.0519	bauA	Beta-alanine--pyruvate transaminase
PA0157	3.5376	triB	Resistance-Nodulation-Cell Division triclosan efflux membrane fusion protein, TriB
PA0158	3.5573	triC	Resistance-Nodulation-Cell Division triclosan efflux transporter, TriC
PA0196	4.3448	pntB	Pyridine nucleotide transhydrogenase, beta subunit
PA0200	6.3756		Hypothetical protein
PA0265	0.3285	gabD	Succinate-semialdehyde dehydrogenase
PA0266	0.1893	gabT	4-aminobutyrate aminotransferase
PA0271	0.3393		Hypothetical protein
PA0314	3.3815		L-cysteine transporter of ABC system FliY
PA0428	0.3356		Probable ATP-dependent RNA helicase
PA0432	0.3021	sahH	S-adenosyl-L-homocysteine hydrolase
PA0462	3.2638		Hypothetical protein
PA0482	0.3414	glcB	Malate synthase G
PA0527	3.8513	dnr	Transcriptional regulator Dnr
PA0529	8.7744		Conserved hypothetical protein
PA0534	18.0468	pauB1	FAD-dependent oxidoreductase
PA0535	10.5572		Probable transcriptional regulator
PA0540	3.4285		Hypothetical protein
PA0567	5.611		Conserved hypothetical protein
PA0578	0.343		Conserved hypothetical protein
PA0610	0.1713	prtN	Transcriptional regulator PrtN
PA0612	0.107	ptrB	Repressor, PtrB
PA0613	0.096		Hypothetical protein
PA0615	0.3299		Hypothetical protein
PA0617	0.3417		Probable bacteriophage protein
PA0618	0.2823		Probable bacteriophage protein
PA0619	0.2686		Probable bacteriophage protein
PA0620	0.3256		Probable bacteriophage protein
PA0621	0.3383		Conserved hypothetical protein
PA0622	0.1798		Probable bacteriophage protein
PA0623	0.1744		Probable bacteriophage protein
PA0624	0.1726		Hypothetical protein
PA0625	0.248		Hypothetical protein
PA0626	0.3291		Hypothetical protein
PA0627	0.1988		Conserved hypothetical protein
PA0628	0.2469		Conserved hypothetical protein
PA0629	0.2271		Conserved hypothetical protein
PA0630	0.2651		Hypothetical protein
PA0631	0.3165		Hypothetical protein
PA0632	0.3007		Hypothetical protein
PA0633	0.321		Hypothetical protein
PA0634	0.2498		Hypothetical protein
PA0635	0.1822		Hypothetical protein
PA0636	0.3207		Hypothetical protein
PA0637	0.3306		Conserved hypothetical protein
PA0638	0.2439		Probable bacteriophage protein
PA0639	0.2522		Conserved hypothetical protein
PA0641	0.2571		Probable bacteriophage protein
PA0713	0.2484		Hypothetical protein
PA0722	0.3313		Hypothetical protein of bacteriophage Pf1
PA0723	0.2611	coaB	Coat protein B of bacteriophage Pf1
PA0788	3.5535		Hypothetical protein
PA0789	0.3326		Probable amino acid permease
PA0795	0.2059	prpC	Citrate synthase 2
PA0796	0.3531	prpB	Carboxyphosphonoenolpyruvate phosphonomutase
PA0807	0.122	ampDh3	N-acetyl-anhydromuramyl-L-alanine amidase AmpDh3
PA0830	5.396		Hypothetical protein
PA0887	0.0059	acsA	Acetyl-coenzyme A synthetase
PA0895	8.7079	aruC	N-succinylglutamate 5-semialdehyde dehydrogenase
PA0896	18.1742	aruF	Arginine/ornithine succinyltransferase AI subunit
PA0897	22.5752	aruG	Arginine/ornithine succinyltransferase AII subunit
PA0898	7.5893	aruD	Succinylglutamate 5-semialdehyde dehydrogenase
PA0899	15.0982	aruB	Succinylarginine dihydrolase
PA0900	3.8955		Hypothetical protein
PA0901	5.0048	aruE	Succinylglutamate desuccinylase
PA0952	0.2849		Hypothetical protein
PA0964	0.3458	pmpR	PqsR-mediated PQS regulator, PmpR
PA1078	3.0869	flgC	Flagellar basal-body rod protein FlgC
PA1080	3.4203	flgE	Flagellar hook protein FlgE
PA1095	3.1687		Hypothetical protein
PA1106	0.2532		Hypothetical protein
PA1123	0.2002		Hypothetical protein
PA1137	4.6502		Probable oxidoreductase
PA1155	0.1468	nrdB	NrdB, tyrosyl radical-harboring component of class Ia ribonucleotide reductase
PA1156	0.2416	nrdA	NrdA, catalytic component of class Ia ribonucleotide reductase
PA1168	8.5169		Hypothetical protein
PA1192	0.2752		Conserved hypothetical protein
PA1195	5.7943		Hypothetical protein
PA1202	3.8483		Probable hydrolase
PA1245	0.0679	aprX	Alkaline protease AprX
PA1246	0.2126	aprD	Alkaline protease secretion protein AprD
PA1247	0.1401	aprE	Alkaline protease secretion protein AprE
PA1248	0.3102	aprF	Alkaline protease secretion outer membrane protein AprF precursor
PA1289	3.1757		Hypothetical protein
PA1333	0.3218		Hypothetical protein
PA1404	4.7955		Hypothetical protein
PA1432	0.1043	lasI	Autoinducer synthesis protein LasI
PA1555	0.103	ccoP2	Cytochrome c oxidase, cbb3-type, CcoP subunit
PA1556	0.1225	ccoO2	Cytochrome c oxidase, cbb3-type, CcoO subunit
PA1561	7.9914	aer	Aerotaxis receptor Aer
PA1616	0.3208		Conserved hypothetical protein
PA1647	3.2736		Probable sulfate transporter
PA1689	3.112		Conserved hypothetical protein
PA1710	0.2127	exsC	ExsC, exoenzyme S synthesis protein C precursor.
PA1711	0.216	exsE	ExsE
PA1712	0.2894	exsB	Exoenzyme S synthesis protein B
PA1714	0.3319	exsD	ExsD
PA1742	0.3472	pauD2	Glutamine amidotransferase class I
PA1745	3.6694		Hypothetical protein
PA1774	0.3221	crfX	CrfX protein
PA1787	0.3405	acnB	Aconitate hydratase 2
PA1789	3.4129		Hypothetical protein
PA1792	0.3177		Conserved hypothetical protein
PA1818	8.3712	ldcA	Lysine-specific pyridoxal 5'-phosphate-dependent carboxylase, LdcA
PA1819	3.3354		Probable amino acid permease
PA1869	0.3172		Probable acyl carrier protein
PA1871	0.3195	lasA	LasA protease precursor
PA1874	10.2671		Hypothetical protein
PA1875	7.8102		Probable outer membrane protein precursor
PA1876	8.8566		Probable ATP-binding/permease fusion ABC transporter
PA1877	14.5339		Probable secretion protein
PA1894	15.5628		Hypothetical protein
PA1895	9.5073		Hypothetical protein
PA1896	5.6947		Hypothetical protein
PA1897	6.615		Hypothetical protein
PA1914	19.1777		Conserved hypothetical protein
PA1984	6.86	exaC	NAD+ dependent aldehyde dehydrogenase ExaC
PA2026	3.1342	0	Conserved hypothetical protein
PA2116	0.312		Conserved hypothetical protein
PA2119	5.4282		Alcohol dehydrogenase (Zn-dependent)
PA2134	14.5149		Hypothetical protein
PA2143	5.2901		Hypothetical protein
PA2147	7.3026	katE	Catalase HPII
PA2153	4.1824	glgB	1,4-alpha-glucan branching enzyme
PA2158	5.5264		Probable alcohol dehydrogenase (Zn-dependent)
PA2159	5.5621		Conserved hypothetical protein
PA2160	7.3794		Probable glycosyl hydrolase
PA2161	7.4849		Hypothetical protein
PA2165	5.86		Probable glycogen synthase
PA2166	6.2831		Hypothetical protein
PA2171	3.4387		Hypothetical protein
PA2174	4.5314		Hypothetical protein
PA2178	4.3471		Hypothetical protein
PA2183	3.9699		Hypothetical protein
PA2190	4.5263		Conserved hypothetical protein
PA2242	3.3348	pslL	Hypothetical protein
PA2259	0.2185	ptxS	Transcriptional regulator PtxS
PA2260	0.1617		Hypothetical protein
PA2261	0.269		Probable 2-ketogluconate kinase
PA2262	0.3346		Probable 2-ketogluconate transporter
PA2263	0.3174		Probable 2-hydroxyacid dehydrogenase
PA2274	0.2432		Hypothetical protein
PA2300	0.2884	chiC	Chitinase
PA2301	0.2743		Hypothetical protein
PA2302	0.2034	ambE	AmbE
PA2303	0.1442	ambD	AmbD
PA2304	0.2032	ambC	AmbC
PA2305	0.124	ambB	AmbB
PA2320	0.1182	gntR	Transcriptional regulator GntR
PA2321	0.0606		Gluconokinase
PA2322	0.2579		Gluconate permease
PA2323	0.2809		Probable glyceraldehyde-3-phosphate dehydrogenase
PA2345	4.2521		Conserved hypothetical protein
PA2384	3.8495		Hypothetical protein
PA2386	4.936	pvdA	L-ornithine N5-oxygenase
PA2393	4.0705		Probable dipeptidase precursor
PA2394	3.6384	pvdN	PvdN
PA2396	4.1899	pvdF	Pyoverdine synthetase F
PA2397	5.8262	pvdE	Pyoverdine biosynthesis protein PvdE
PA2398	6.0852	fpvA	Ferripyoverdine receptor
PA2403	4.1378		Hypothetical protein
PA2404	6.2042		Hypothetical protein
PA2405	6.4164		Hypothetical protein
PA2407	6.3218		Probable adhesion protein
PA2409	3.5174		Probable permease of ABC transporter
PA2411	3.598		Probable thioesterase
PA2412	5.8676		Conserved hypothetical protein
PA2413	4.7425	pvdH	L-2,4-diaminobutyrate:2-ketoglutarate 4-aminotransferase, PvdH
PA2433	4.425		Hypothetical protein
PA2442	3.7953	gcvT2	Glycine cleavage system protein T2
PA2476	3.1746	dsbG	Thiol:disulfide interchange protein DsbG
PA2485	3.2765		Hypothetical protein
PA2501	3.3798		Hypothetical protein
PA2513	4.3502	antB	Anthranilate dioxygenase small subunit
PA2564	0.3016		Hypothetical protein
PA2575	0.1378		Hypothetical protein
PA2624	0.2209	idh	Isocitrate dehydrogenase
PA2627	0.3107		Conserved hypothetical protein
PA2640	0.313	nuoE	NADH dehydrogenase I chain E
PA2641	0.3256	nuoF	NADH dehydrogenase I chain F
PA2644	0.3321	nuoI	NADH Dehydrogenase I chain I
PA2663	3.4189	ppyR	psl and pyoverdine operon regulator, PpyR
PA2679	0.088		Hypothetical protein
PA2698	4.044		Probable hydrolase
PA2717	4.3195	cpo	Chloroperoxidase precursor
PA2741	0.3506	rplT	50S ribosomal protein L20
PA2753	10.0163		Hypothetical protein
PA2754	3.5883		Conserved hypothetical protein
PA2776	0.2005		Conserved hypothetical protein
PA2860	0.3363		Hypothetical protein
PA2864	4.5657		Conserved hypothetical protein
PA2939	14.6923		Probable aminopeptidase
PA3006	8.8486	psrA	Transcriptional regulator PsrA
PA3022	0.1589		Hypothetical protein
PA3038	0.1226		Probable porin
PA3068	3.7614	gdhB	NAD-dependent glutamate dehydrogenase
PA3113	0.353	trpF	N-(5'phosphoribosyl)anthranilate (PRA) isomerase
PA3126	0.1861	ibpA	Heat-shock protein IbpA
PA3181	0.1146		2-keto-3-deoxy-6-phosphogluconate aldolase
PA3182	0.1931	pgl	6-phosphogluconolactonase
PA3183	0.1891	zwf	Glucose-6-phosphate 1-dehydrogenase
PA3190	0.3136		Probable binding protein component of ABC sugar transporter
PA3191	0.1796		pProbable two-component sensor
PA3192	0.2534	gltR	Two-component response regulator GltR
PA3193	0.1807	glk	Glucokinase
PA3194	0.159	edd	Phosphogluconate dehydratase
PA3195	0.073	gapA	Glyceraldehyde 3-phosphate dehydrogenase
PA3221	3.3354	csaA	CsaA protein
PA3231	5.5274		Hypothetical protein
PA3232	0.0968		Probable nuclease
PA3233	0.1675		Hypothetical protein
PA3234	0.0413		Probable sodium:solute symporter
PA3235	0.0282		Conserved hypothetical protein
PA3250	3.2008		Hypothetical protein
PA3274	7.7481		Hypothetical protein
PA3289	4.7562		Hypothetical protein
PA3330	0.3434		Probable short chain dehydrogenase
PA3334	0.305		Probable acyl carrier protein
PA3337	13.6683	rfaD	ADP-L-glycero-D-mannoheptose 6-epimerase
PA3341	4.7585		Probable transcriptional regulator
PA3344	0.3	recQ	ATP-dependent DNA helicase RecQ
PA3353	0.3512		Hypothetical protein
PA3361	0.3145	lecB	Fucose-binding lectin PA-IIL
PA3362	6.2308		Hypothetical protein
PA3369	6.4511		Hypothetical protein
PA3370	4.005		Hypothetical protein
PA3371	4.5953		Hypothetical protein
PA3431	0.3215		Conserved hypothetical protein
PA3478	0.1637	rhlB	Rhamnosyltransferase chain B
PA3479	0.1817	rhlA	Rhamnosyltransferase chain A
PA3496	0.1447		Hypothetical protein
PA3525	0.3011	argG	Argininosuccinate synthase
PA3529	0.0695		Probable peroxidase
PA3568	0.13		Probable acetyl-coa synthetase
PA3569	0.2991	mmsB	3-hydroxyisobutyrate dehydrogenase
PA3572	3.2336		Hypothetical protein
PA3629	3.9512	adhC	Alcohol dehydrogenase class III
PA3662	0.067		Hypothetical protein
PA3664	0.3199		Conserved hypothetical protein
PA3677	3.3633		Probable Resistance-Nodulation-Cell Division (RND) efflux membrane fusion protein precursor
PA3721	3.4325	nalC	NalC
PA3769	0.328	guaA	GMP synthase
PA3770	0.2665	guaB	Inosine-5'-monophosphate dehydrogenase
PA3788	4.1457		Hypothetical protein
PA3790	0.2714	oprC	Putative copper transport outer membrane porin OprC precursor
PA3791	0.348		Hypothetical protein
PA3841	0.2715	exoS	Exoenzyme S
PA3858	3.244		Probable amino acid-binding protein
PA3877	20.1849	narK1	Nitrite extrusion protein 1
PA3905	3.2284		Hypothetical protein
PA3915	20.191	moaB1	Molybdopterin biosynthetic protein B1
PA3934	5.0014		Conserved hypothetical protein
PA3989	0.3325	holA	DNA polymerase III, delta subunit
PA4006	0.3042	nadD	Nicotinic acid mononucleotide adenylyltransferase
PA4015	3.5068		Conserved hypothetical protein
PA4117	3.1773	bphP	Bacterial phytochrome, BphP
PA4139	5.139		Hypothetical protein
PA4142	0.3474		Probable secretion protein
PA4171	6.6356		Probable protease
PA4175	72.0848	piv	Protease IV
PA4181	0.2772		Hypothetical protein
PA4182	0.1813		hypothetical protein
PA4217	0.2896	phzS	flavin-containing monooxygenase
PA4218	0.1289	ampP	AmpP
PA4219	0.3526		Hypothetical protein
PA4220	0.036		Hypothetical protein
PA4221	0.1096	fptA	Fe(III)-pyochelin outer membrane receptor precursor
PA4223	0.2885		Probable ATP-binding component of ABC transporter
PA4224	0.1755	pchG	Pyochelin biosynthetic protein PchG
PA4225	0.209	pchF	Pyochelin synthetase
PA4226	0.1276	pchE	Dihydroaeruginoic acid synthetase
PA4228	0.1465	pchD	Pyochelin biosynthesis protein PchD
PA4229	0.1754	pchC	Pyochelin biosynthetic protein PchC
PA4230	0.1799	pchB	Salicylate biosynthesis protein PchB
PA4231	0.2026	pchA	Salicylate biosynthesis isochorismate synthase
PA4242	0.3457	rpmJ	50S ribosomal protein L36
PA4250	0.3499	rpsN	30S ribosomal protein S14
PA4268	0.3256	rpsL	30S ribosomal protein S12
PA4271	0.3486	rplL	50S ribosomal protein L7 / L12
PA4290	0.081		Probable chemotaxis transducer
PA4294	8.2279		Hypothetical protein
PA4298	3.6461		Hypothetical protein
PA4310	4.4663	pctB	Chemotactic transducer PctB
PA4311	3.2441		Conserved hypothetical protein
PA4328	3.1596		Hypothetical protein
PA4348	3.469		Conserved hypothetical protein
PA4352	3.1809		Conserved hypothetical protein
PA4359	6.5951		Conserved hypothetical protein
PA4484	0.35	gatB	Glu-tRNA(Gln) amidotransferase subunit B
PA4497	3.5534		Probable binding protein component of ABC transporter
PA4502	0.3362		Probable binding protein component of ABC transporter
PA4506	0.3471		Probable ATP-binding component of ABC dipeptide transporter
PA4563	0.2526	rpsT	30S ribosomal protein S20
PA4567	0.2016	rpmA	50S ribosomal protein L27
PA4571	3.2007		Probable cytochrome c
PA4577	3.2439		Hypothetical protein
PA4590	3.5757	pra	Protein activator
PA4610	9.8559		Hypothetical protein
PA4624	5.0117	cdrB	Cyclic diguanylate-regulated TPS partner B, CdrB
PA4625	5.7514	cdrA	Cyclic diguanylate-regulated TPS partner A, CdrA
PA4640	0.3191	mqoB	Malate:quinone oxidoreductase
PA4648	16.5323		Hypothetical protein
PA4649	9.8631		Hypothetical protein
PA4650	7.8901		Hypothetical protein
PA4651	5.7068		Probable pili assembly chaperone
PA4653	13.1343		Hypothetical protein
PA4677	0.1723		Hypothetical protein
PA4703	3.3858		Hypothetical protein
PA4735	3.3574		Hypothetical protein
PA4786	4.1856		Probable short-chain dehydrogenase
PA4788	3.5448		Hypothetical protein
PA4843	0.3092		Probable two-component response regulator
PA4852	0.2093		Conserved hypothetical protein
PA4874	3.1223		Conserved hypothetical protein
PA4876	4.3176	osmE	Osmotically inducible lipoprotein OsmE
PA4877	4.1129		Hypothetical protein
PA4915	3.1828		Probable chemotaxis transducer
PA5026	5.9235		Hypothetical protein
PA5027	4.4252		Hypothetical protein
PA5049	0.254	rpmE	50S ribosomal protein L31
PA5108	3.1324		Hypothetical protein
PA5111	3.3632	gloA3	Lactoylglutathione lyase
PA5153	3.2148		Amino acid (lysine/arginine/ornithine/histidine/octopine) ABC transporter periplasmic binding protein
PA5170	9.0327	arcD	Arginine/ornithine antiporter
PA5171	3.892	arcA	Arginine deiminase
PA5172	3.5415	arcB	Ornithine carbamoyltransferase, catabolic
PA5173	3.9364	arcC	Carbamate kinase
PA5181	4.113		Probable oxidoreductase
PA5208	5.3756		Conserved hypothetical protein
PA5212	7.393		Hypothetical protein
PA5217	3.212		Probable binding protein component of ABC iron transporter
PA5232	6.2655		Conserved hypothetical protein
PA5271	3.2635		Hypothetical protein
PA5285	0.2816		Hypothetical protein
PA5315	0.3095	rpmG	50S ribosomal protein L33
PA5316	0.3537	rpmB	50S ribosomal protein L28
PA5355	11.6589	glcD	Glycolate oxidase subunit GlcD
PA5445	0.0694		Probable coenzyme A transferase
PA5481	5.027		Hypothetical protein
PA5482	4.3463		Hypothetical protein
PA5522	0.2797		Probable glutamine synthetase
PA5523	0.2662		Probable aminotransferase
PA5569	0.2249	rnpA	Ribonuclease P protein component
PA5570	3.3554	rpmH	50S ribosomal protein L34
PA5570	0.3401	rpmH	50S ribosomal protein L34
