# Supplementary material for: From the Environment to the Host: Re-Wiring of the Transcriptome of Pseudomonas aeruginosa from 22°C to 37°C
Source: PLoS One. 2014 Feb 24;9(2):e89941. doi: 10.1371/journal.pone.0089941 (PMC3933690; doi:10.1371/journal.pone.0089941)
Supplement: Table S4 — Temperature regulated genes recognized in three different datasets. Table with the list of the genes commonly dysregulated in the present study, at 28°C versus 37°C in P. aeruginosa PA14 as determined by RNA-seq [13] or in ex vivo samples of burn wound P. aeruginosa infections compared to 37°C using Affymetrix microarrays [16]. Fold changes obtained in this study are indicated. Fold changes greater than 1 are indicative or genes up-regulated at 22°C, while fold changes less than 1 are indicative of genes up-regulated at 37°C. (XLSX) [file pone.0089941.s009.xlsx]

## Sheet: Sheet1
Table S 4. Temperature regulated genes recognized in three different datasets
			Fold change
Locus Tag	Gene Name	Product Name	This study	Bielecki et al. [15]	Wurtzel et al. [12]
PA0610	prtN	transcriptional regulator PrtN	-2.5454	-3.43	-2.06938
PA1168		hypothetical protein	3.09033	-5.35	4.50566
PA1556	ccoO2	Cytochrome c oxidase, cbb3-type, CcoO subunit	-3.02915	2.61	-2.89693
PA2386	pvdA	L-ornithine N5-oxygenase	2.30334	4.16	3.02451
PA2393		probable dipeptidase precursor	2.02521	2.84	2.97053
PA2411		probable thioesterase	1.8472	6.05	3.13519
PA2939		probable aminopeptidase	3.87699	-5.76	2.48993
PA3234		probable sodium:solute symporter	-4.59771	-4.54	3.10006
PA3235		conserved hypothetical protein	-5.14816	-4.37	4.10609
PA5315	rpmG	50S ribosomal protein L33	-1.69199	2.15	1.50473
